# Supplementary material
Source: PubMed Central journal article supplement (PMC3187000)
Supplement: supp_55_10_4718__1.pdf [file supp_55_10_4718__1.pdf]

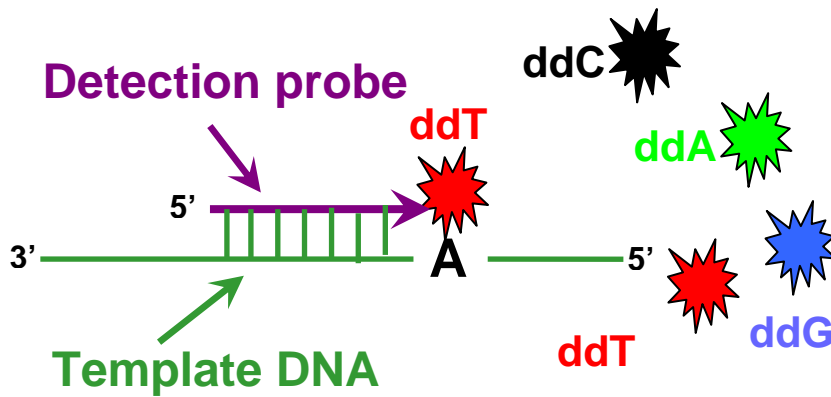

**Figure S1. Schematic of the SNaPshot assay.** An extension probe anneals immediately 5' of the site of interest in the template. The use of ddNTPs allows only one nucleotide to be extended from the 3' end of the detection probe. Each ddNTP is labeled with a different fluorescent dye (black, C; red, T; blue, G; green, A), resulting in differential labeling of the extended probes, revealing the genotype of the extended locus.
